# Supplementary material for: Metabolic Profile of Patients with Long COVID: A Cross-Sectional Study
Source: MDPI journal article supplement (doi:10.3390/nu15051197), 2023-02-27
Supplement: s1 [file s1]

**Supplementary Table S1.** Adopted reference values for clinical and laboratory exams.

| Exam                     | Desirable                                              | Increased Risk                                         |
|--------------------------|--------------------------------------------------------|--------------------------------------------------------|
| BMI, kg/m <sup>2</sup>   | 18,5 – 24,9                                            | ≥30                                                    |
| SBP, mm/Hg               | <130                                                   | ≥140                                                   |
| DBP, mm/Hg               | <85                                                    | ≥90                                                    |
| LDL-C, mg/dL             | <130                                                   | ≥160                                                   |
| HDL-C, mg/dL             | ≥60                                                    | <40                                                    |
| Total cholesterol, mg/dL | <200                                                   | ≥240                                                   |
| Triglycerides, mg/dL     | <150                                                   | ≥200                                                   |
| FBG, mg/dL               | 65 – 99                                                | ≥126                                                   |
| HbA1c, %                 | 4.8 – 5.9                                              | ≥6,5                                                   |
| Ferritin, ng/mL          | 15 – 160 <sup>a</sup> / 25 – 300 <sup>b</sup>          | ≥160 <sup>a</sup> / ≥300 <sup>b</sup>                  |
| ESR, mm                  | <15 <sup>c</sup> , <20 <sup>d</sup> , <30 <sup>e</sup> | ≥15 <sup>c</sup> , ≥20 <sup>d</sup> , ≥30 <sup>e</sup> |
| CRP detection            | Negative                                               | Positive                                               |

(a), females <50 years; (b), males / females ≥50 years; (c), males <50 years; (d), males ≥50 years / females <50 years; (e), females ≥50 years; BMI, body mass index; SBP, systolic blood pressure; DBP, diastolic blood pressure; LDL-C, low-density cholesterol; HDL-C, high-density cholesterol; FBG, fasting blood glucose; HbA1c, glycated haemoglobin A1c; ESR, erythrocyte sedimentation rate; CRP, C-reactive protein.
